# Supplementary material for: Potent Alkaline Phosphatase Inhibitors, Pyrazolo-Oxothiazolidines: Synthesis, Biological Evaluation, Molecular Docking, and Kinetic Studies
Source: MDPI journal article supplement (doi:10.3390/ijms232113262), 2022-10-31
Supplement: s1 [file s1]

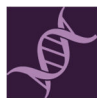

*Supporting Information*

# Potent Alkaline Phosphatase Inhibitors, Pyrazolo-Oxothiazolidines: Synthesis, Biological Evaluation, Molecular Docking, and Kinetic Studies

Narges Hosseini Nasab <sup>a</sup>, Hussain Raza <sup>a</sup>, Rok Su Shim <sup>a</sup>, Mubashir Hassan <sup>b</sup>, Andrzej Kloczkowski <sup>b</sup> and Song Ja Kim <sup>a,\*</sup>

<sup>a</sup> Department of Biological Sciences, Kongju National University, Gongju, Chungnam 32588, Korea

<sup>b</sup> The Steve and Cindy Rasmussen Institute for Genomic Medicine at Nationwide Children's Hospital, Department of Pediatrics, Columbus, Ohio 43205, United States of America

\* Correspondence: [ksj85@kongju.ac.kr](mailto:ksj85@kongju.ac.kr)

## Supporting Figure captions:

**Fig. S1:** IR Spectrum of 7a

**Fig. S2:** <sup>1</sup>H NMR Spectrum of 7a

**Fig. S3:** <sup>13</sup>C NMR Spectrum of 7a

**Fig. S4:** IR Spectrum of 7b

**Fig. S5:** <sup>1</sup>H NMR Spectrum of 7b

**Fig. S6:** <sup>13</sup>C NMR Spectrum of 7b

**Fig. S7:** IR Spectrum of 7c

**Fig. S8:** <sup>1</sup>H NMR Spectrum of 7c

**Fig. S9:** <sup>13</sup>C NMR Spectrum of 7c

**Fig. S10:** IR Spectrum of 7d

**Fig. S11:** <sup>1</sup>H NMR Spectrum of 7d

**Fig. S12:** <sup>13</sup>C NMR Spectrum of 7d

**Fig. S13:** IR Spectrum of 7e

**Fig. S14:** <sup>1</sup>H NMR Spectrum of 7e

**Fig. S15:** <sup>13</sup>C NMR Spectrum of 7e

**Fig. S16:** IR Spectrum of 7f

**Fig. S17:**  $^1\text{H}$  NMR Spectrum of 7f

**Fig. S18:**  $^{13}\text{C}$  NMR Spectrum of 7f

**Fig. S19:** IR Spectrum of 7g

**Fig. S20:**  $^1\text{H}$  NMR Spectrum of 7g

**Fig. S21:**  $^{13}\text{C}$  NMR Spectrum of 7g

**Fig. S22:** IR Spectrum of 7h

**Fig. S23:**  $^1\text{H}$  NMR Spectrum of 7h

**Fig. S24:**  $^{13}\text{C}$  NMR Spectrum of 7h

**Fig. S25:** IR Spectrum of 7i

**Fig. S26:**  $^1\text{H}$  NMR Spectrum of 7i

**Fig. S27:**  $^{13}\text{C}$  NMR Spectrum of 7i

**Fig. S28:** IR Spectrum of 7j

**Fig. S29:**  $^1\text{H}$  NMR Spectrum of 7j

**Fig. S30:**  $^{13}\text{C}$  NMR Spectrum of 7j

**Fig. S31:** IR Spectrum of 7k

**Fig. S32:**  $^1\text{H}$  NMR Spectrum of 7k

**Fig. S33:**  $^{13}\text{C}$  NMR Spectrum of 7k

**Fig. S34:** IR Spectrum of 7l

**Fig. S35:**  $^1\text{H}$  NMR Spectrum of 7l

**Fig. S36:**  $^{13}\text{C}$  NMR Spectrum of 7l

**Fig. S37:** IR Spectrum of 7m

**Fig. S38:**  $^1\text{H}$  NMR Spectrum of 7m

**Fig. S39:**  $^{13}\text{C}$  NMR Spectrum of 7m

**Fig. S40:** IR Spectrum of 7n

**Fig. S41:**  $^1\text{H}$  NMR Spectrum of 7n

**Fig. S42:**  $^{13}\text{C}$  NMR Spectrum of 7n

**Fig. S43:** 2D-docking depiction of 7a complex against alkaline phosphatase

**Fig. S44:** 2D-docking depiction of 7b complex against alkaline phosphatase

**Fig. S45:** 2D-docking depiction of 7c complex against alkaline phosphatase

**Fig. S46:** 2D-docking depiction of 7d complex against alkaline phosphatase

**Fig. S47:** 2D-docking depiction of 7e complex against alkaline phosphatase

**Fig. S48:** 2D-docking depiction of 7f complex against alkaline phosphatase

**Fig. S49:** 2D-docking depiction of 7g complex against alkaline phosphatase

**Fig. S50:** 2D-docking depiction of 7h complex against alkaline phosphatase

**Fig. S51:** 2D-docking depiction of 7i complex against alkaline phosphatase

**Fig. S52:** 2D-docking depiction of 7j complex against alkaline phosphatase

**Fig. S53:** 2D-docking depiction of 7k complex against alkaline phosphatase

**Fig. S54:** 2D-docking depiction of 7l complex against alkaline phosphatase

**Fig. S55:** 2D-docking depiction of 7m complex against alkaline phosphatase

**Fig. S56:** 2D-docking depiction of 7n complex against alkaline phosphatase

The detection of signals originating from common contaminants during routine NMR use presents a challenge (water, solvents, stabilizers, oils). Grease (silicon grease) is a typical contaminant used in glassware joints. Grease peaks in  $\text{CDCl}_3$  as a solvent can be found at  $\delta$  0.07, 0.08, and 1.26 ppm in  $^1\text{H}$  NMR and at  $\delta$  1.04 and 29.76 ppm in  $^{13}\text{C}$  NMR <sup>1</sup>.

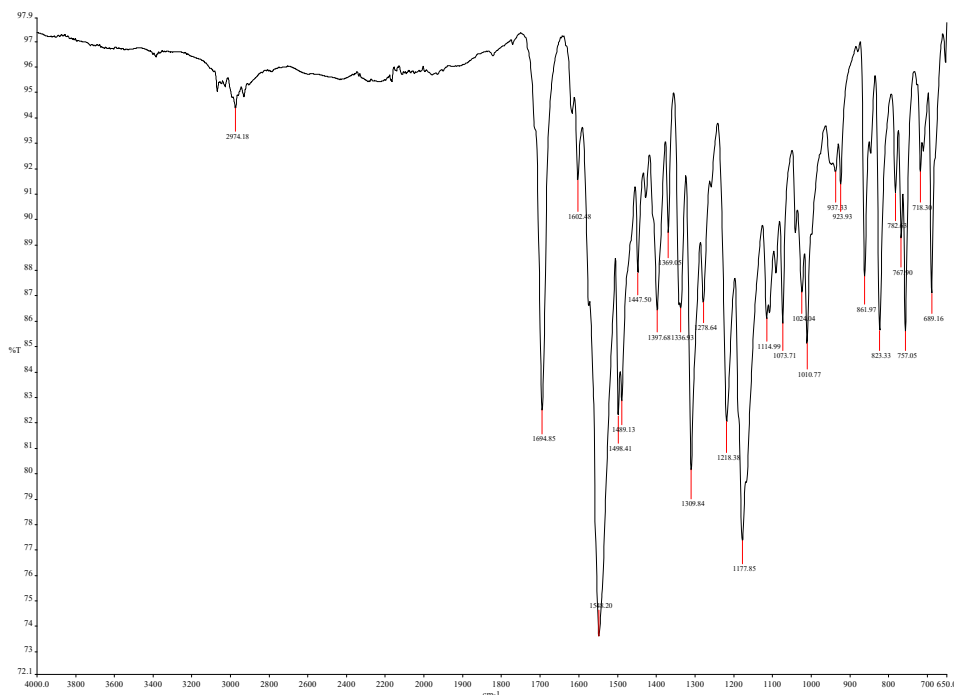

Fig. S1, ES†

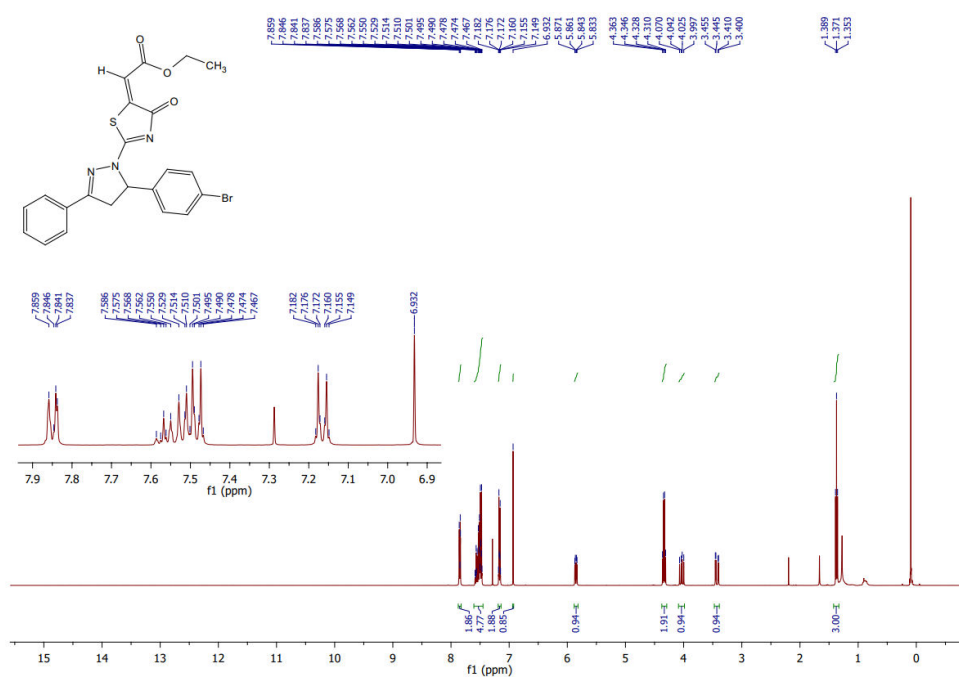

Fig. S2, ES†

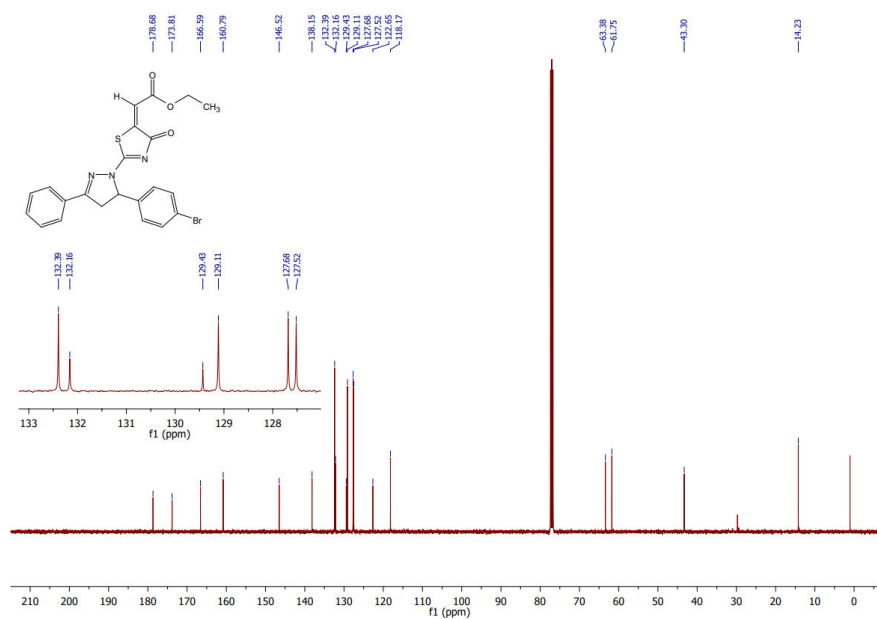

Fig. S3, ES†

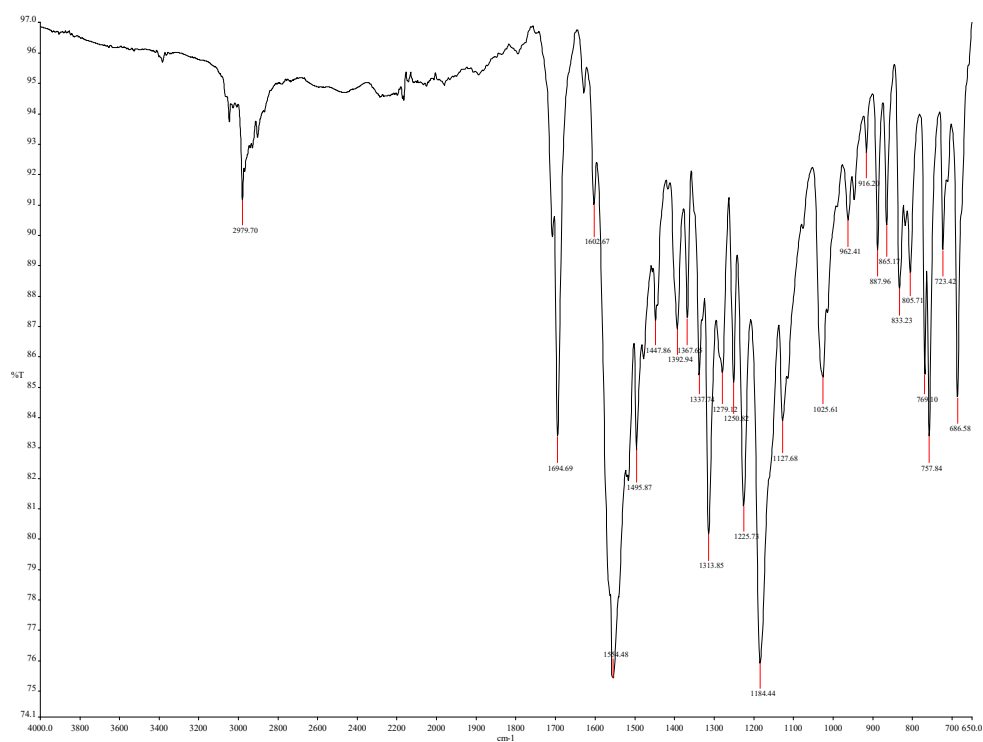

Fig. S4, ES†



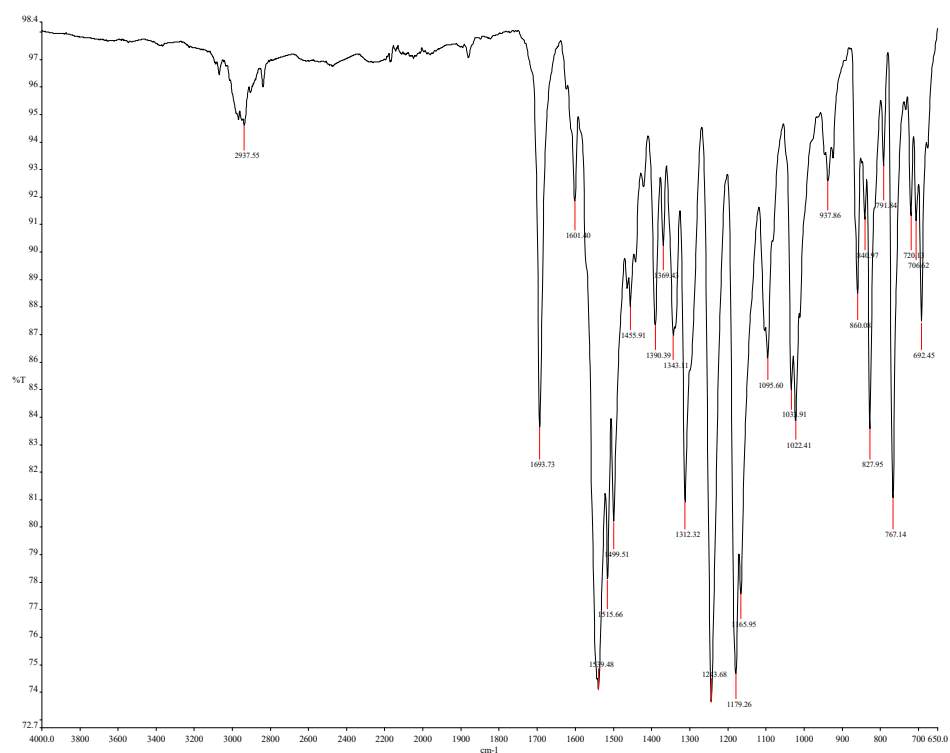

Fig. S7, ES‡

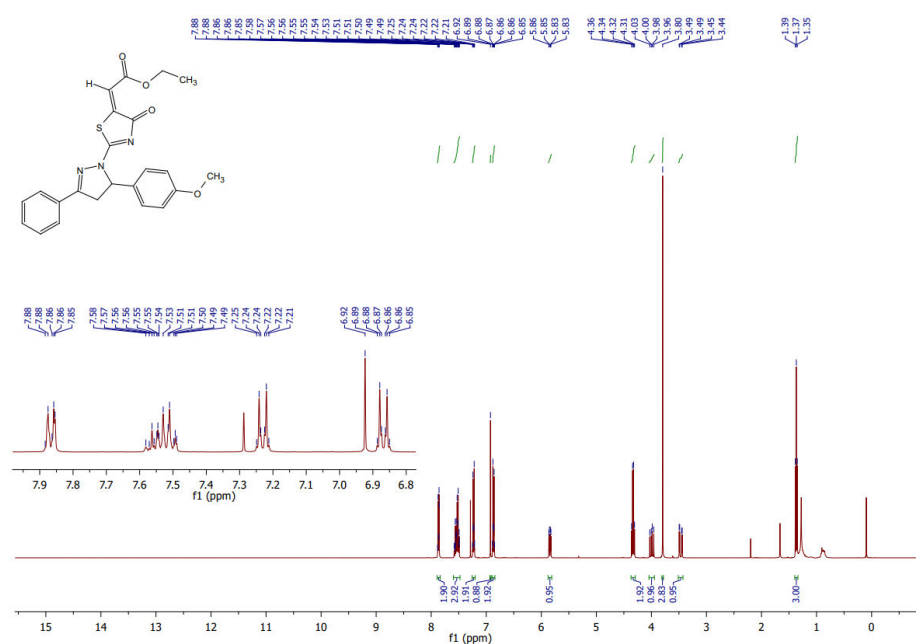

Fig. S8, ES‡

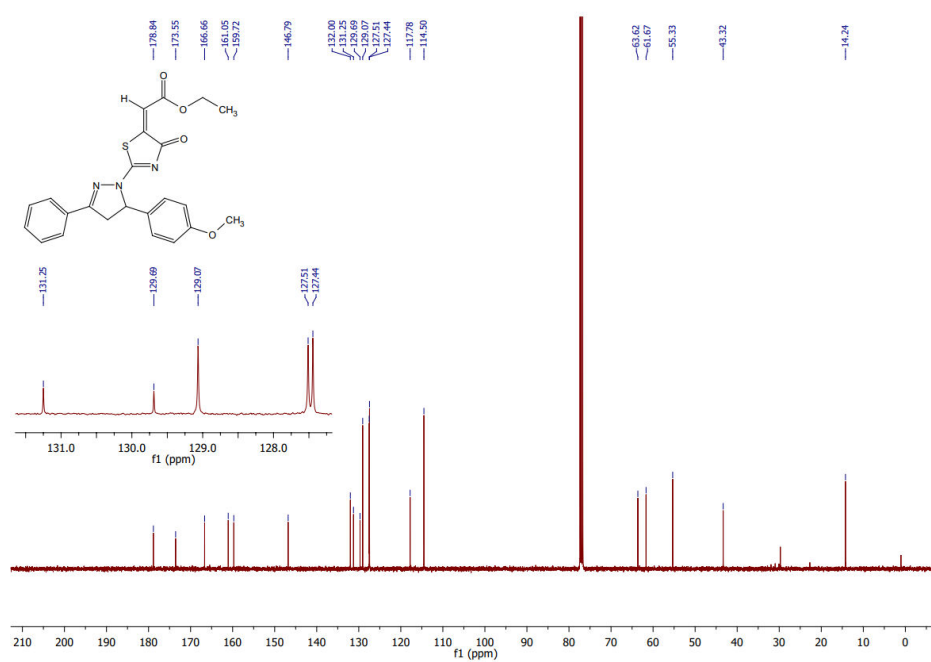

Fig. S9, ES†

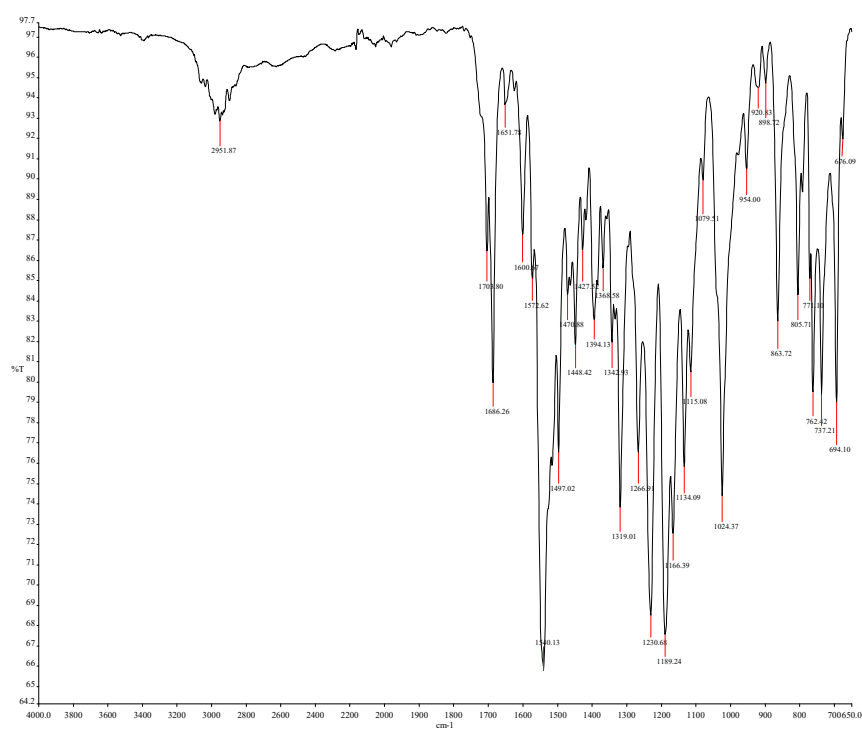

Fig. S10, ES†



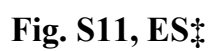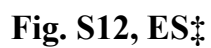

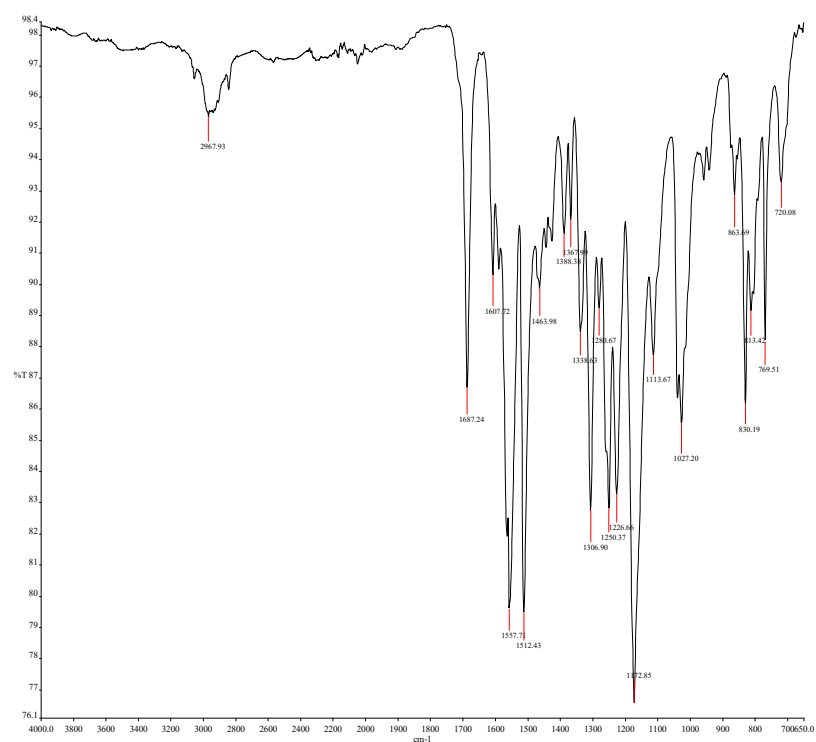

Fig. S13, ES†

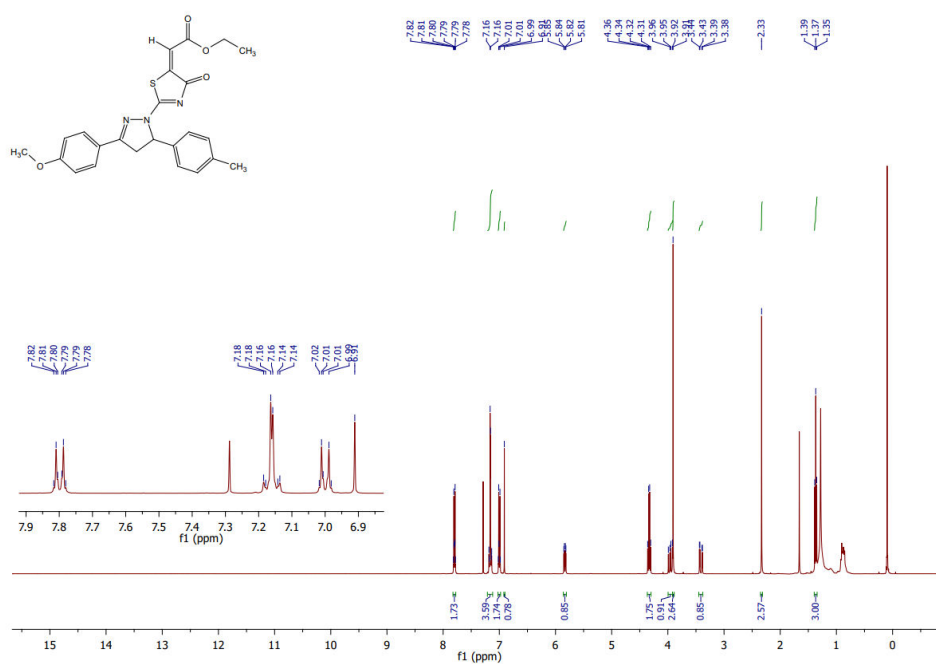

Fig. S14, ES†

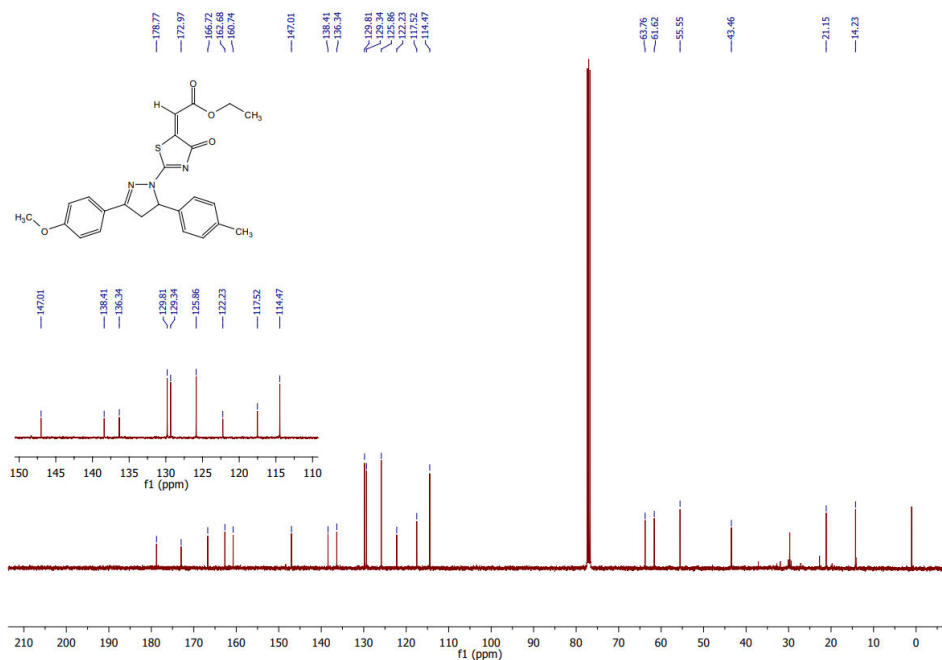

Fig. S15, ES†

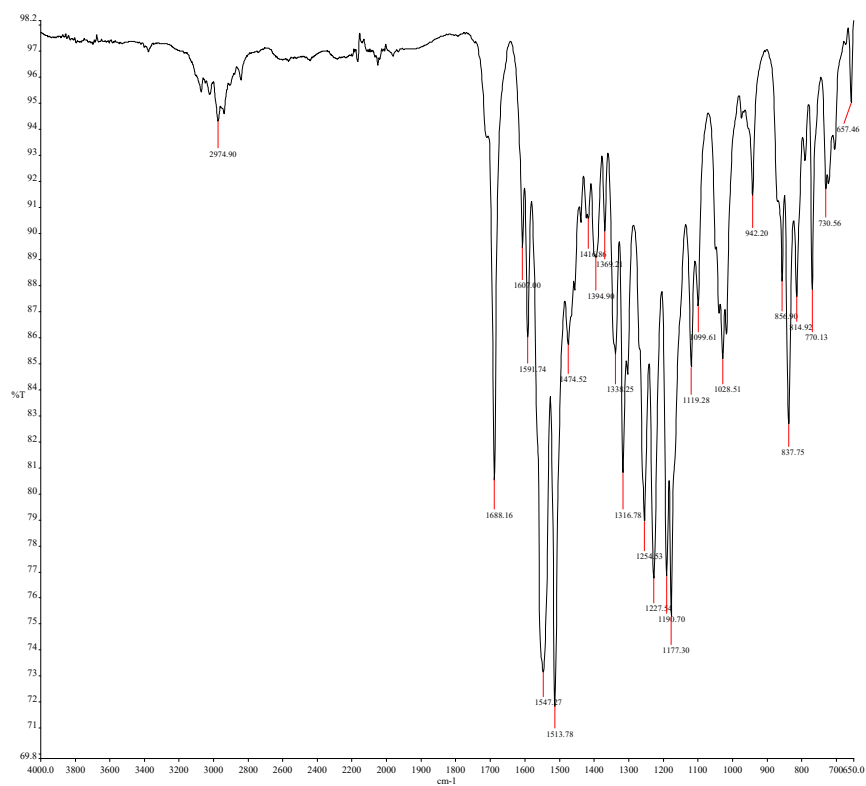

Fig. S16, ES†

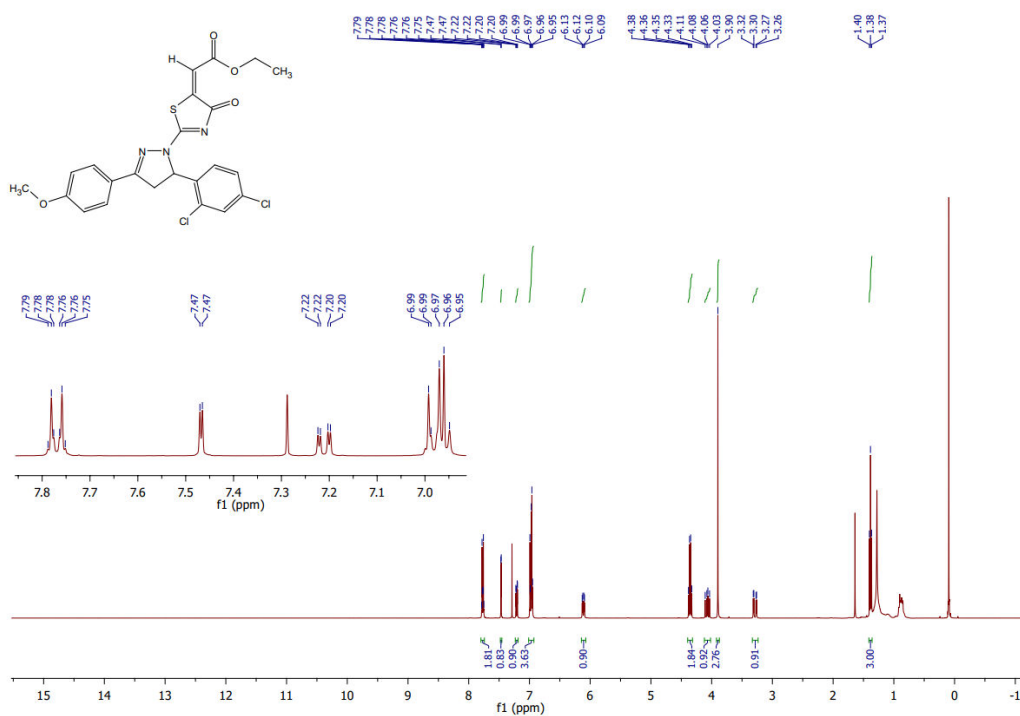

Fig. S17, ES†

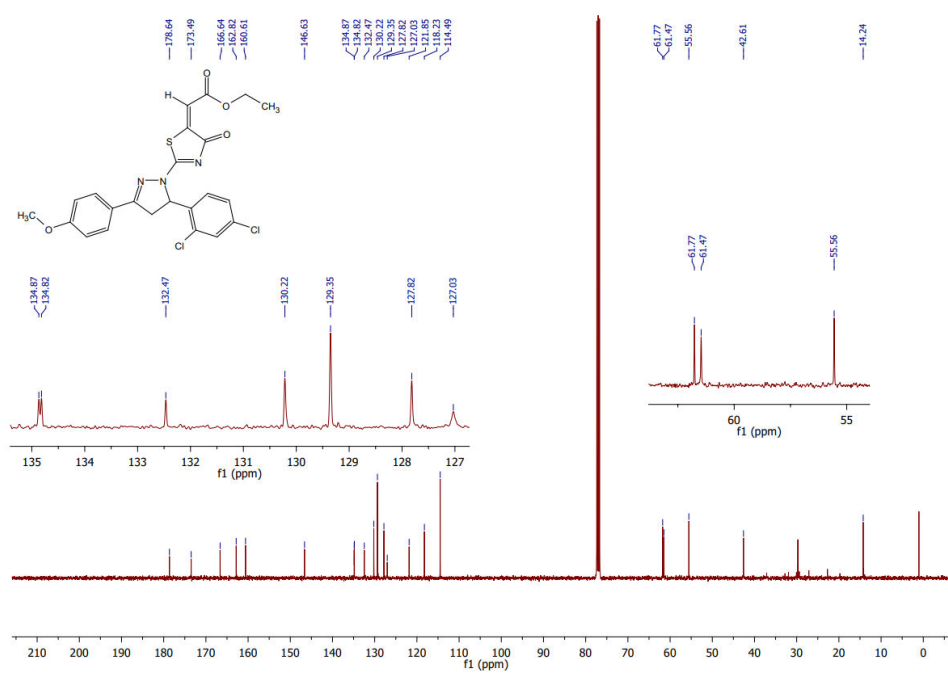

Fig. S18, ES†

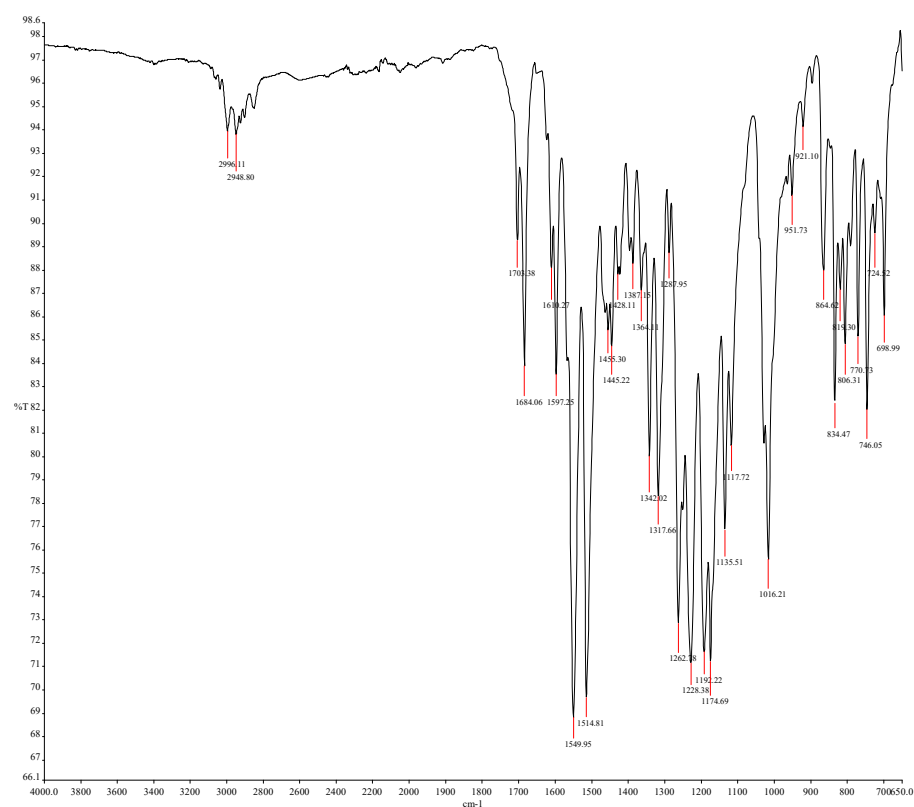

Fig. S19, ES†

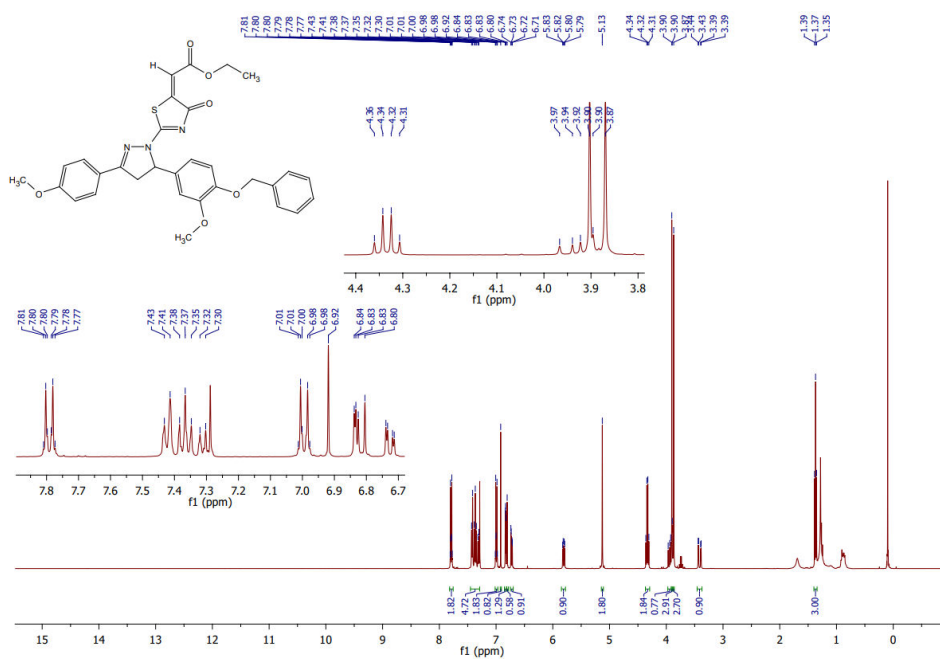

Fig. S20, ES†

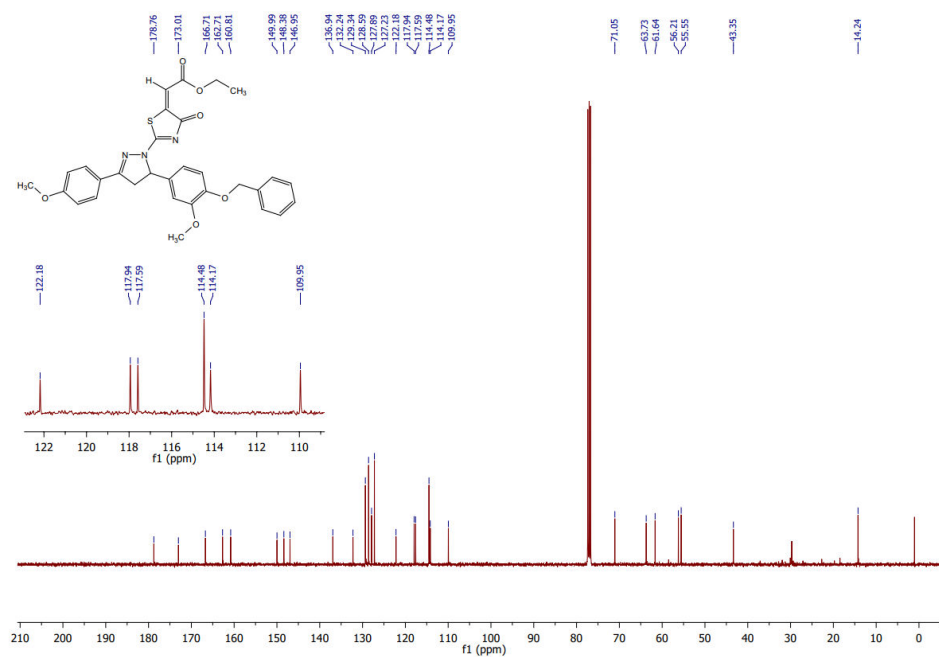

Fig. S21, ES†

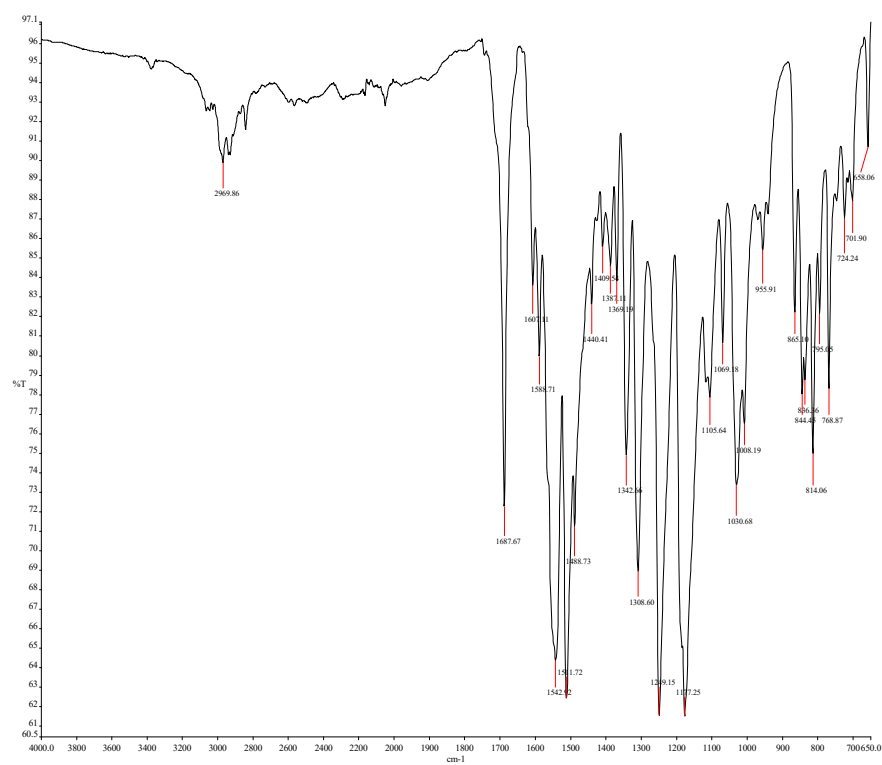

Fig. S22, ES†

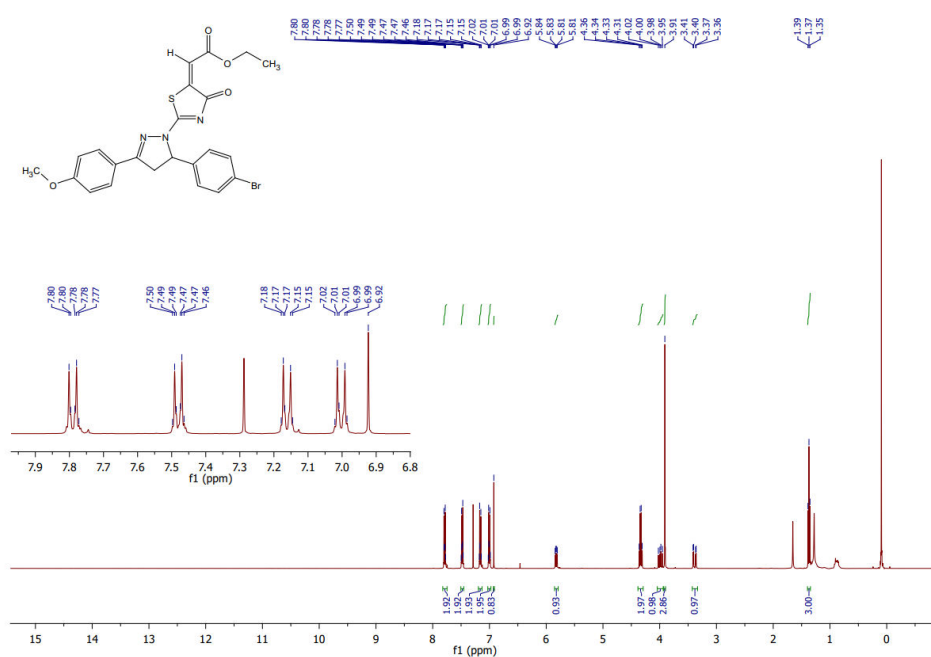

Fig. S23, ES†

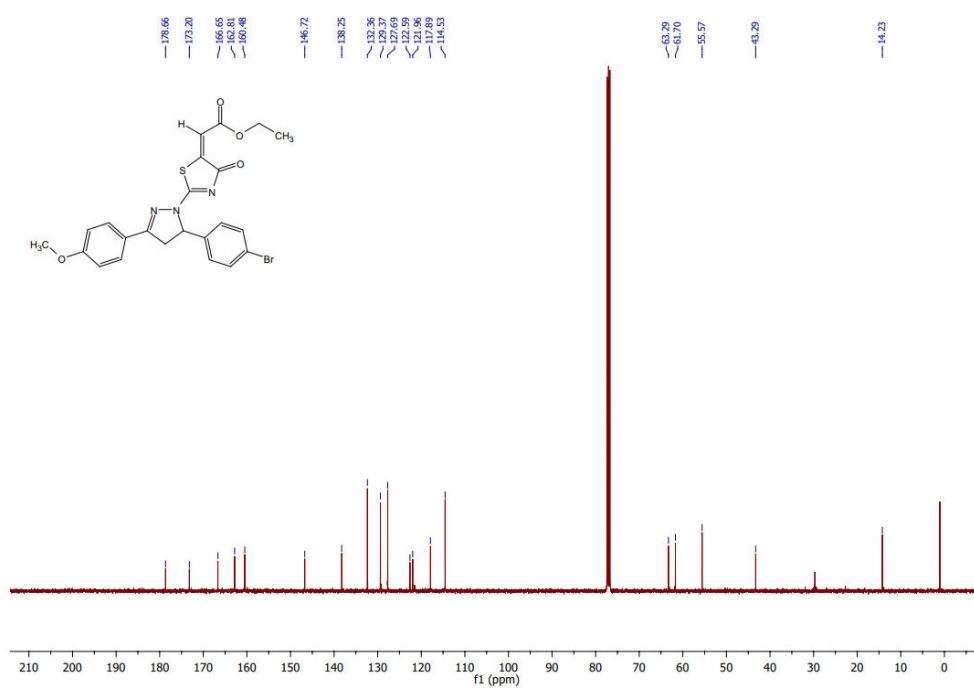

Fig. S24, ES†

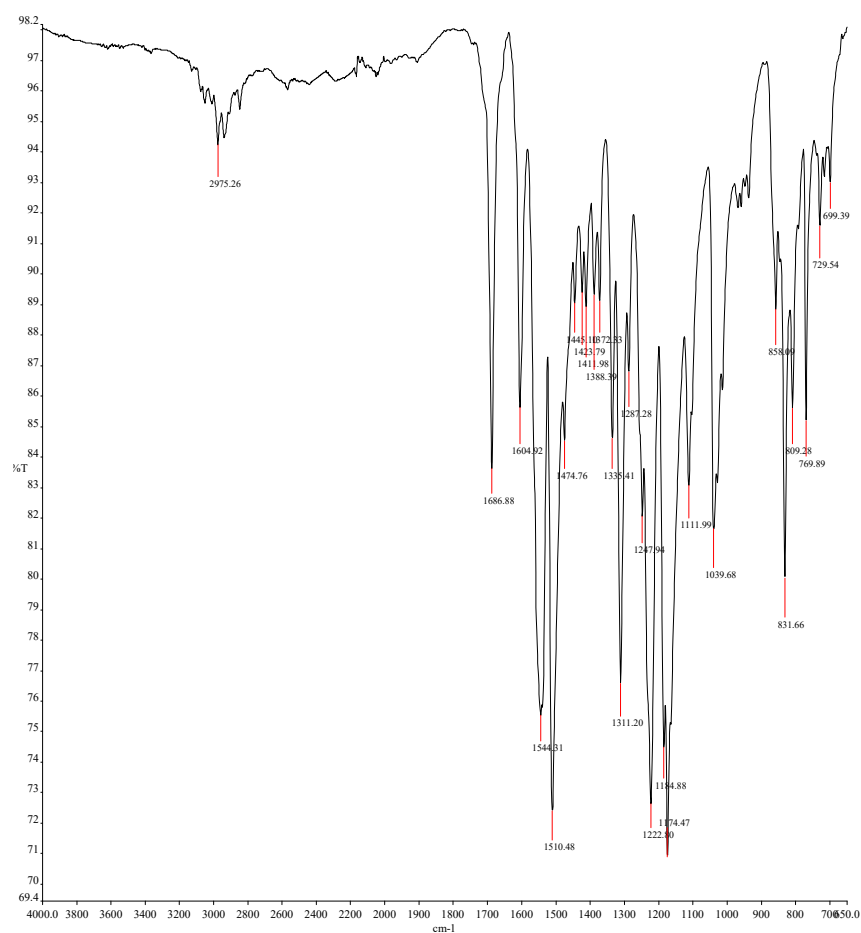

Fig. S25, ES†

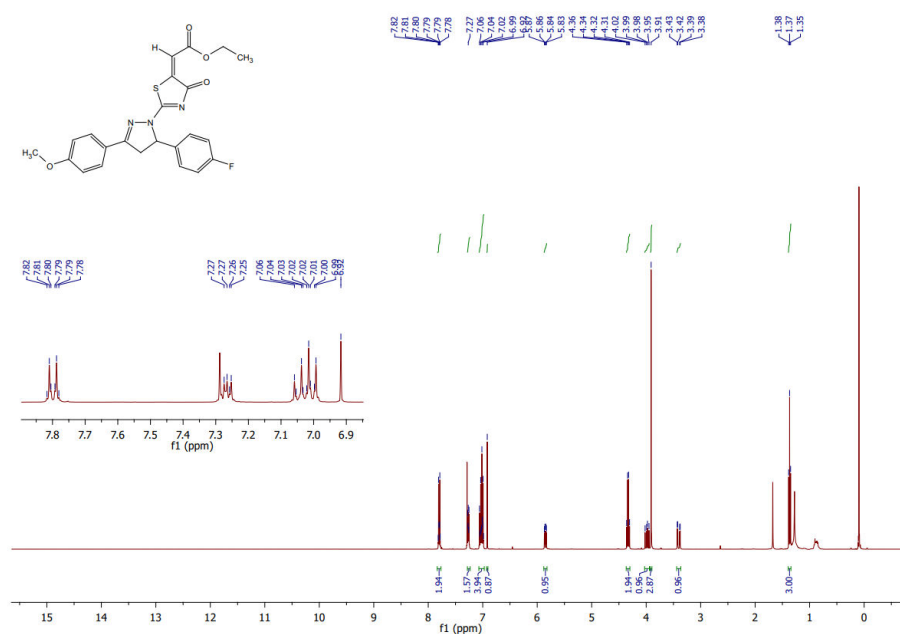

Fig. S26, ES†



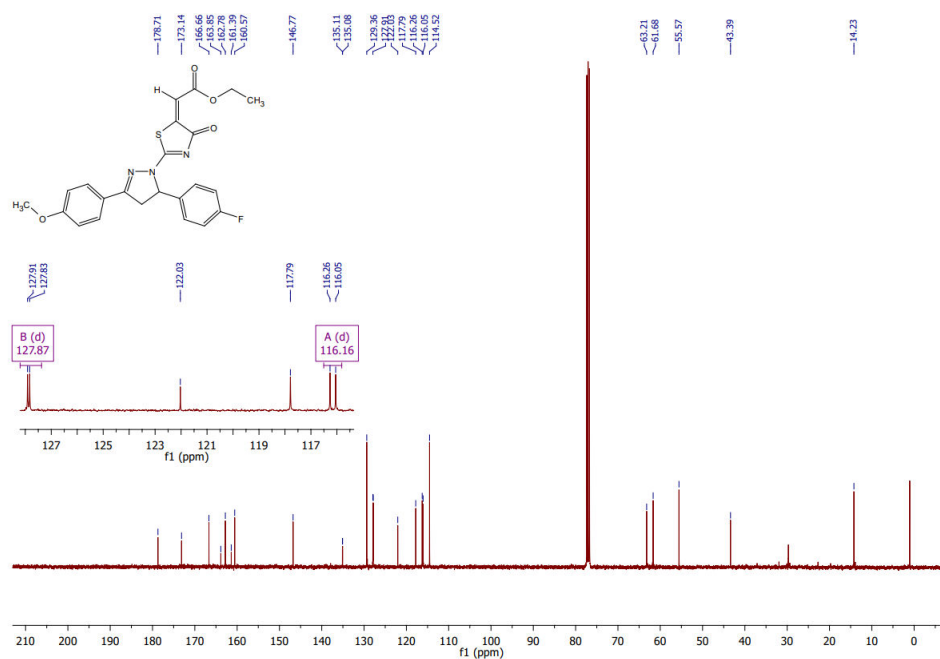Fig. S27, ES<sup>+</sup>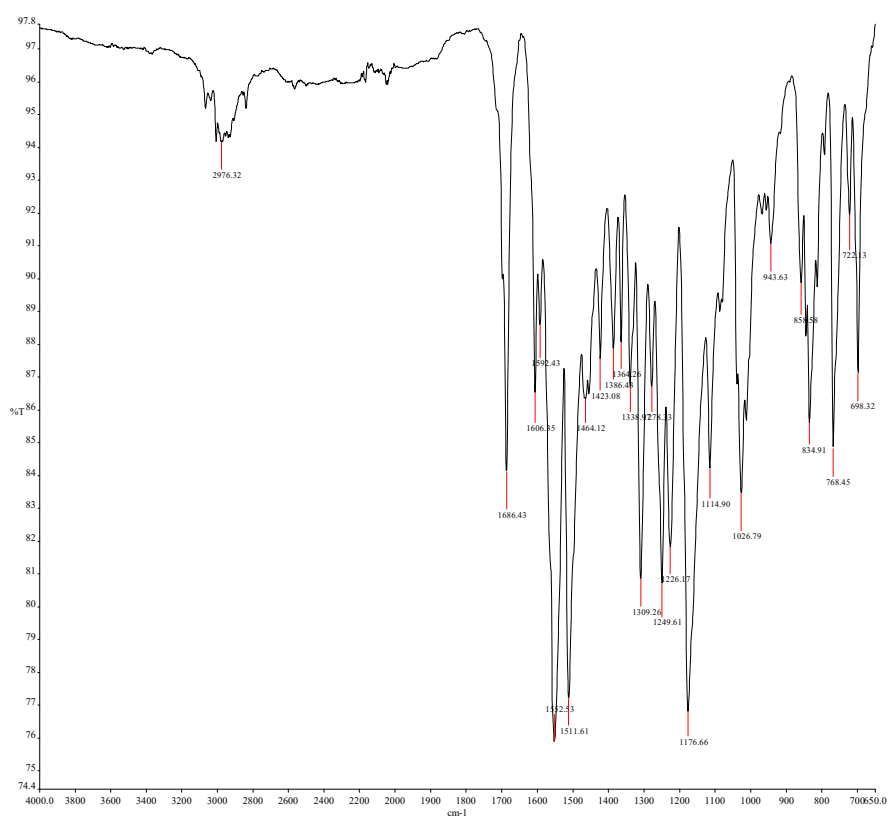Fig. S28, ES<sup>+</sup>

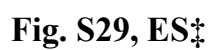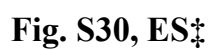

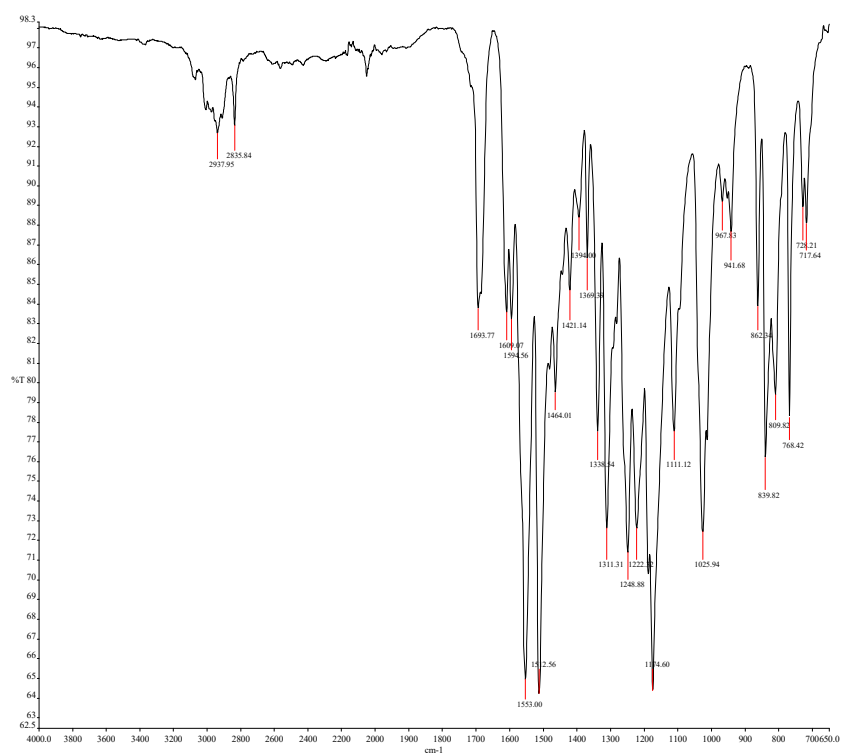Fig. S31, ES<sup>+</sup>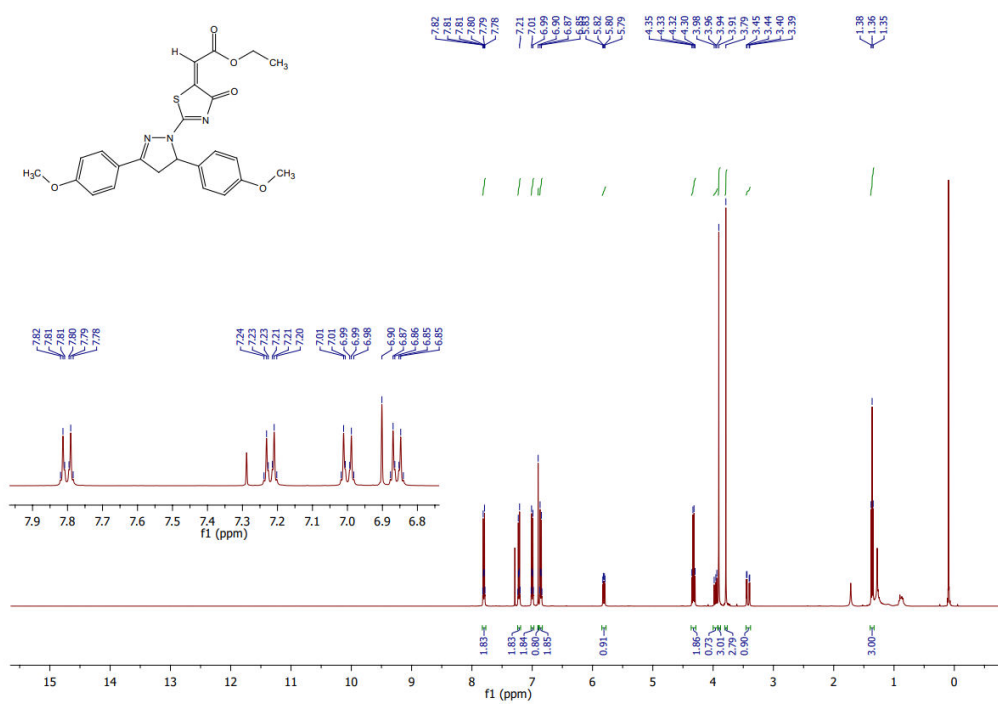Fig. S32, ES<sup>+</sup>

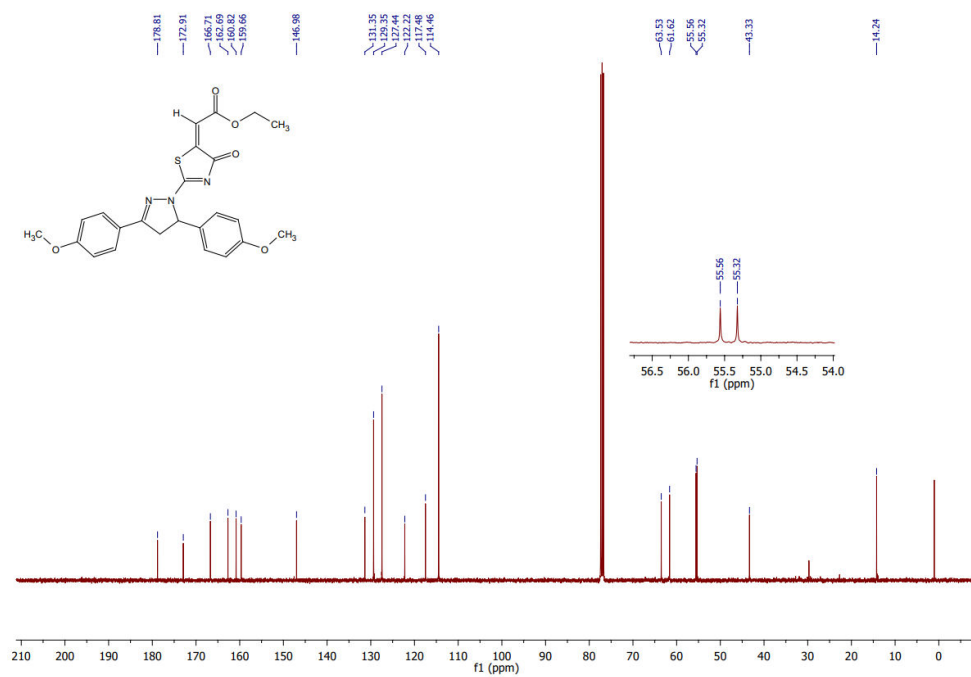

Fig. S33, ES†

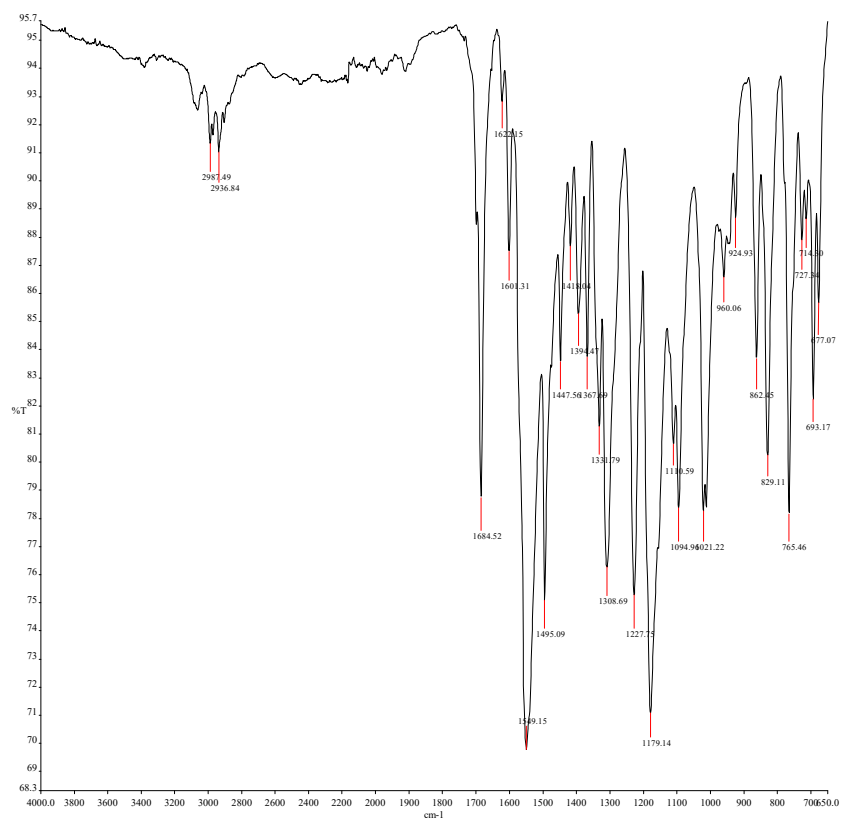

Fig. S34, ES†

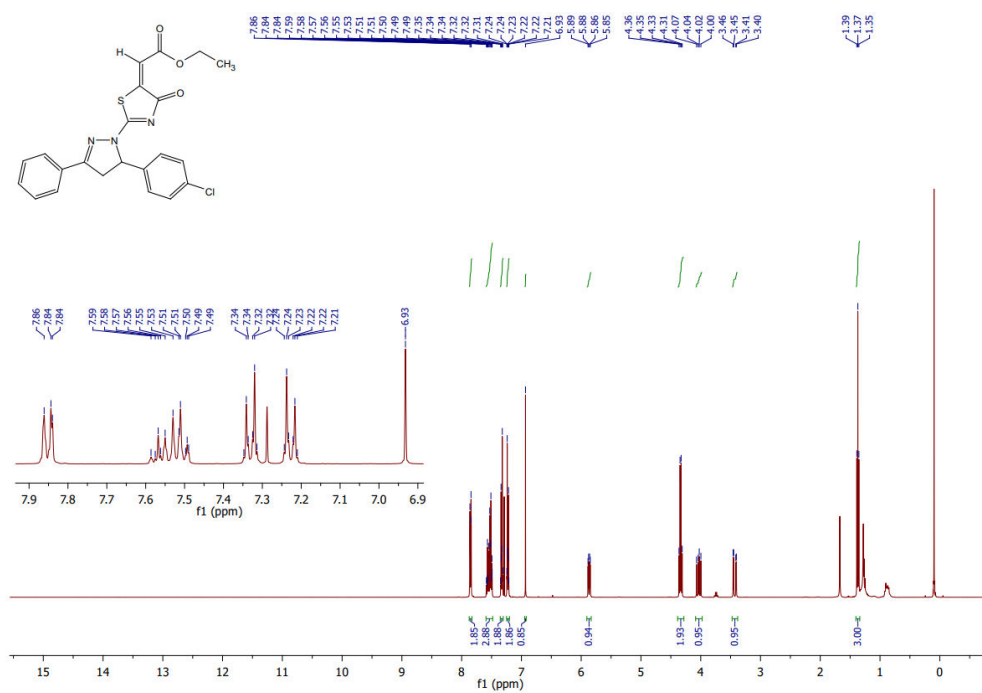Fig. S35, ES<sup>+</sup>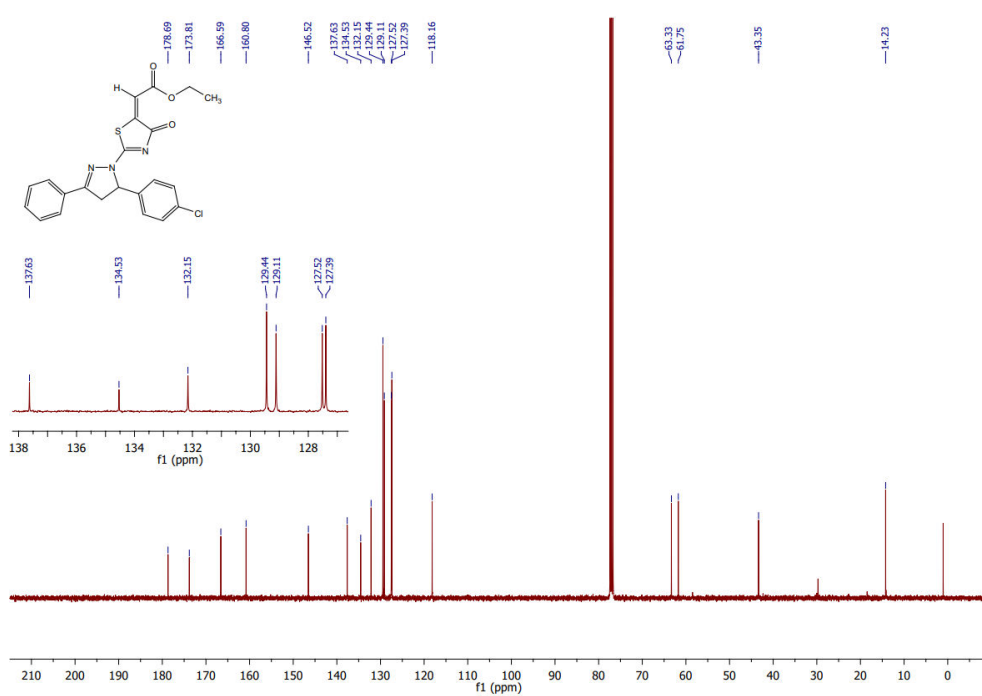Fig. S36, ES<sup>+</sup>

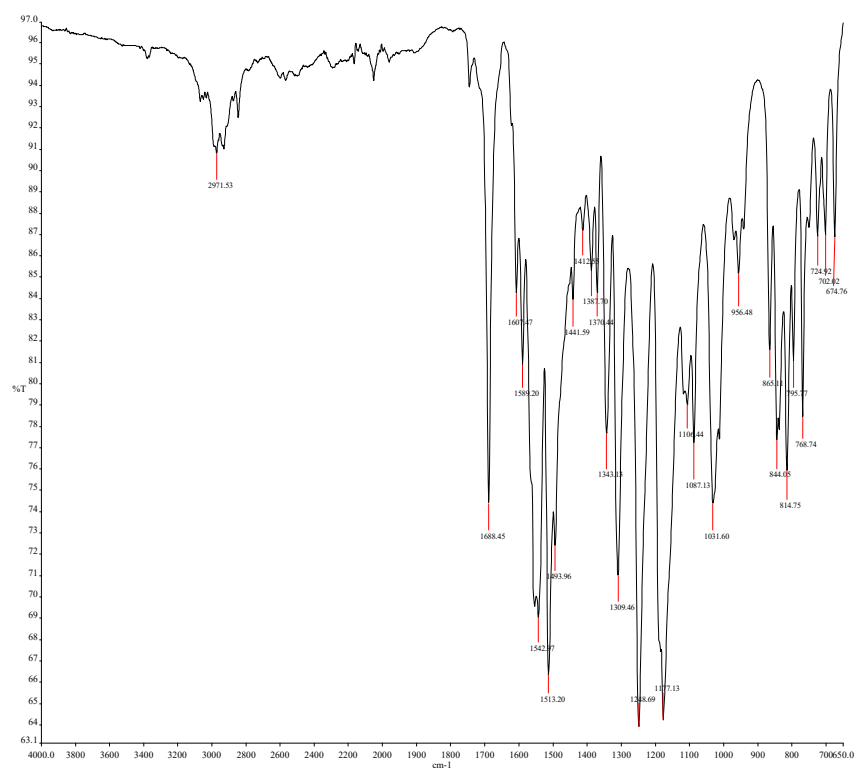

Fig. S37, ES†

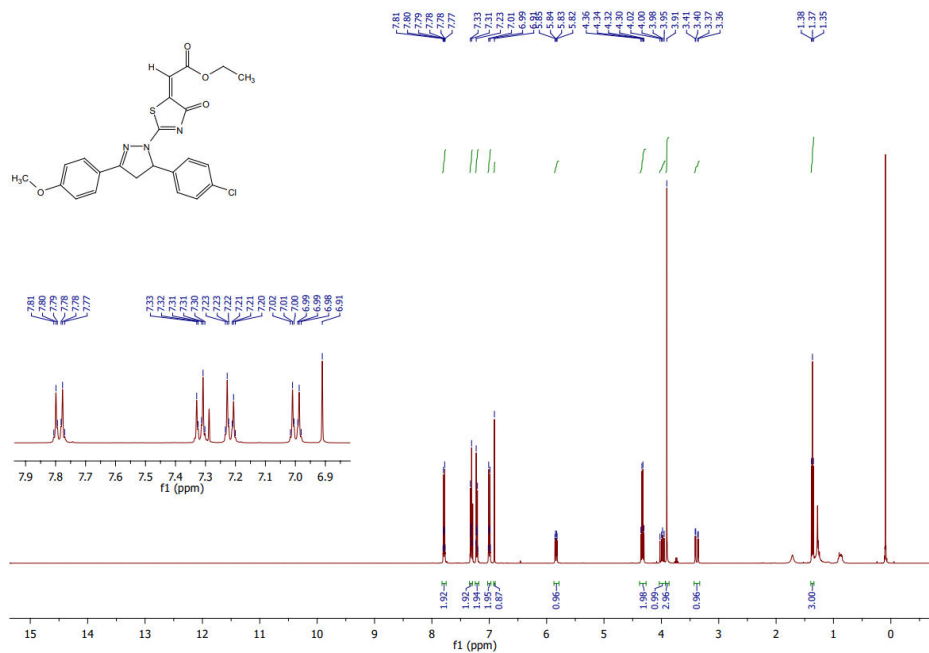

Fig. S38, ES†

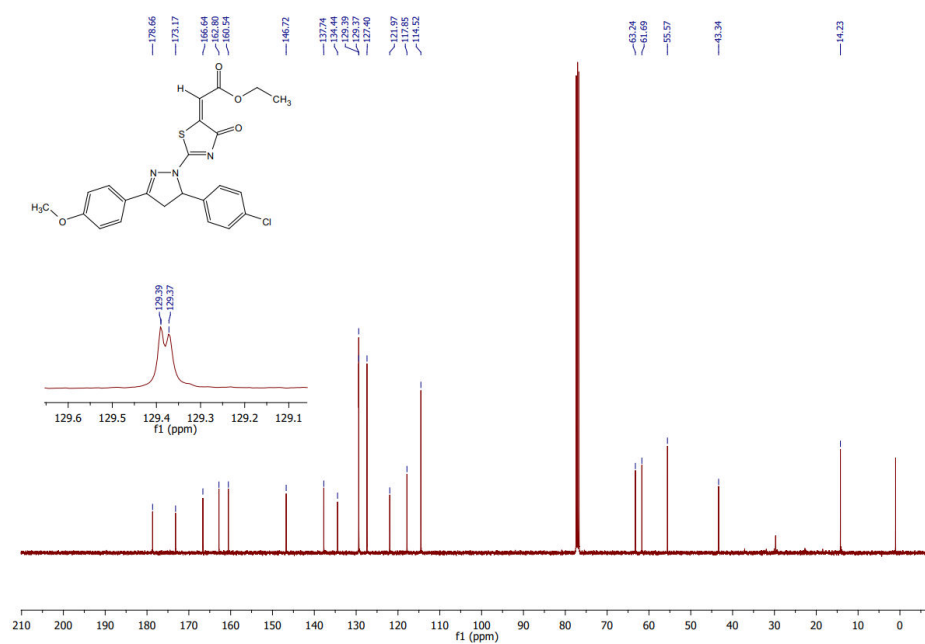

Fig. S39, ES†

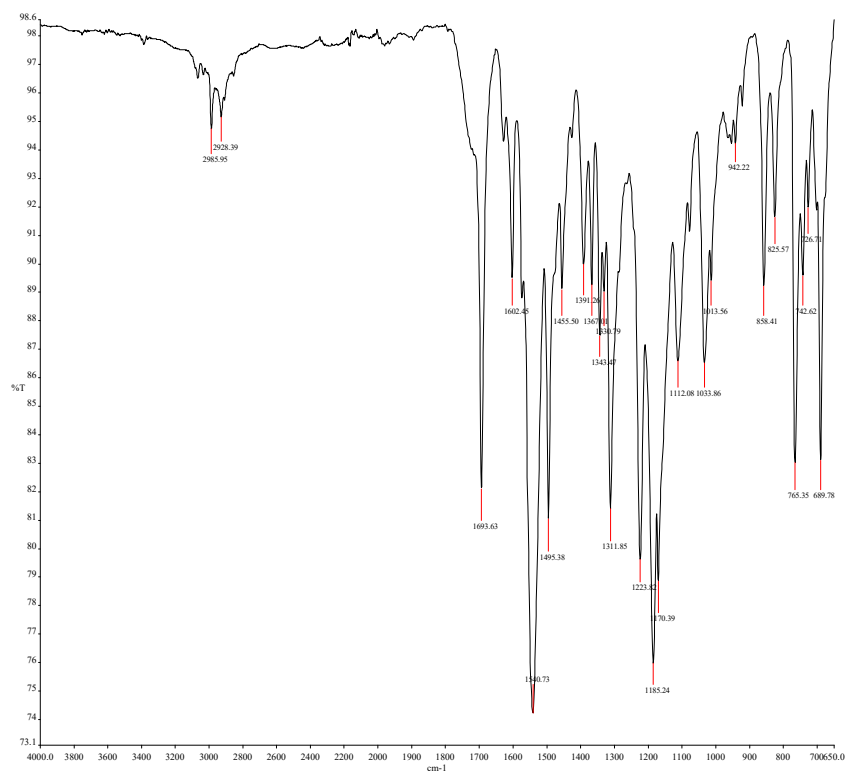

Fig. S40, ES†

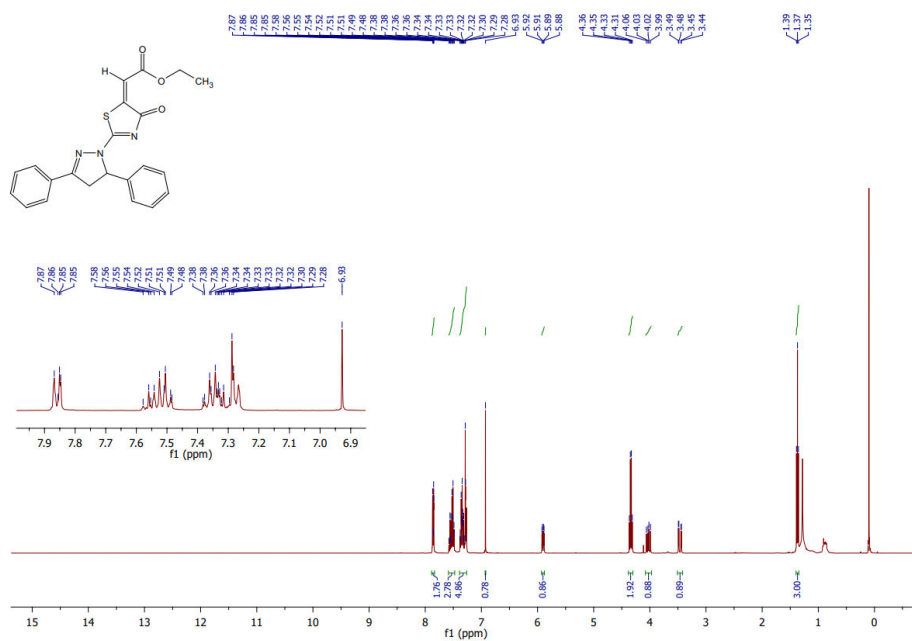Fig. S41, ES<sup>+</sup>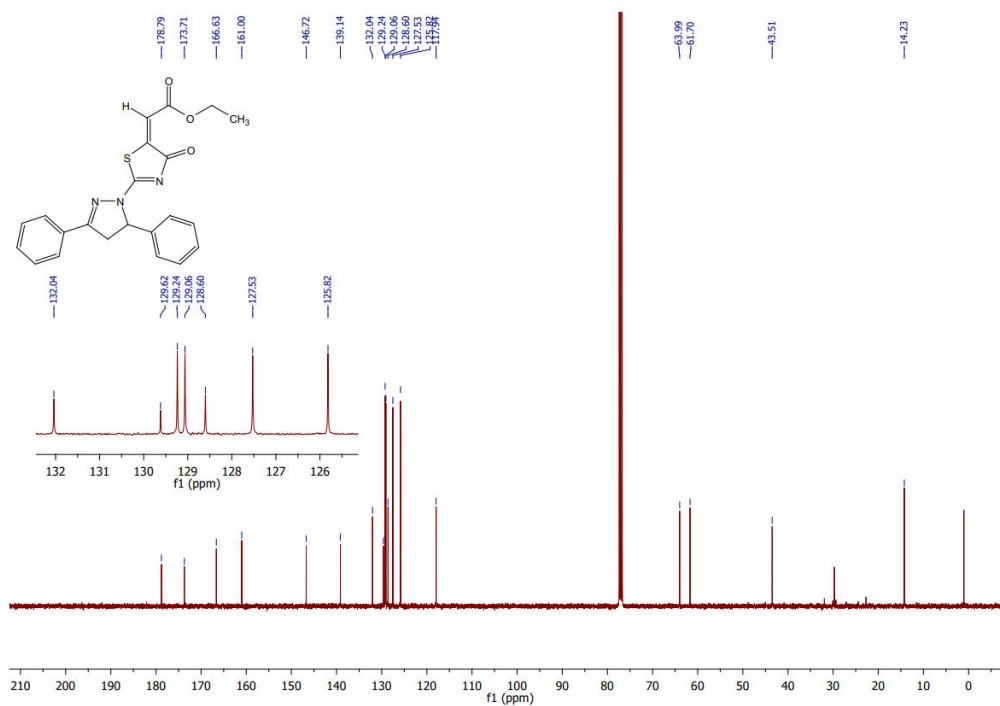Fig. S42, ES<sup>+</sup>



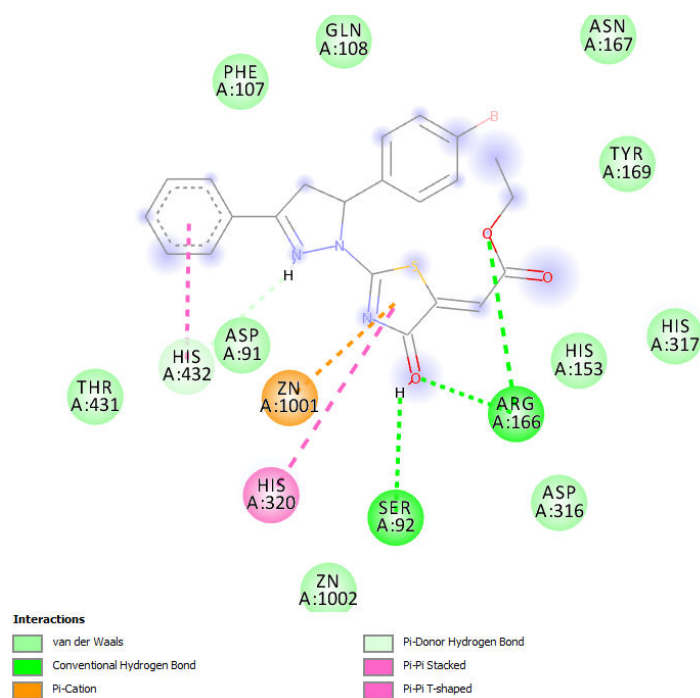

Fig. S43, ES‡

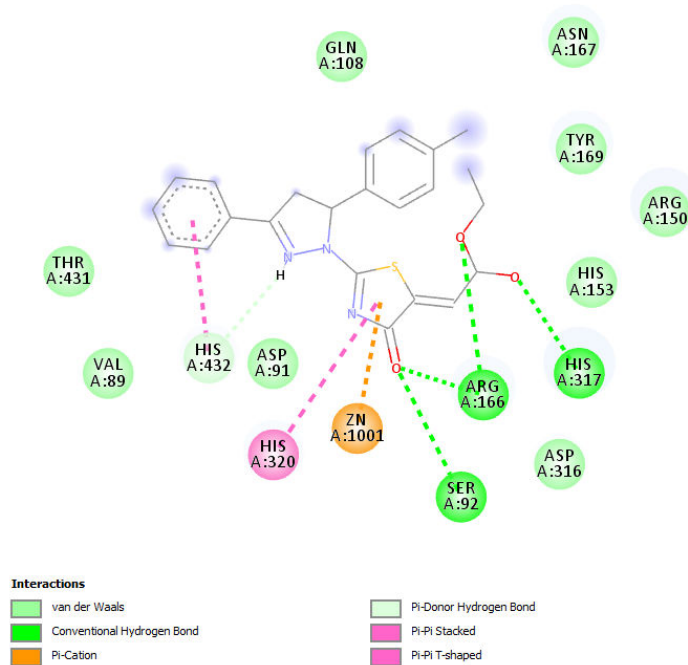

Fig. S44, ES‡

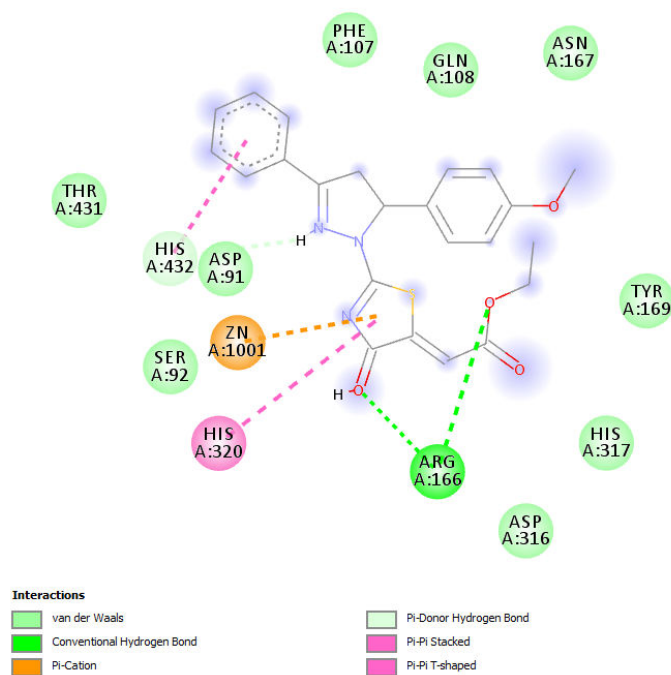

Fig. S45, ES‡

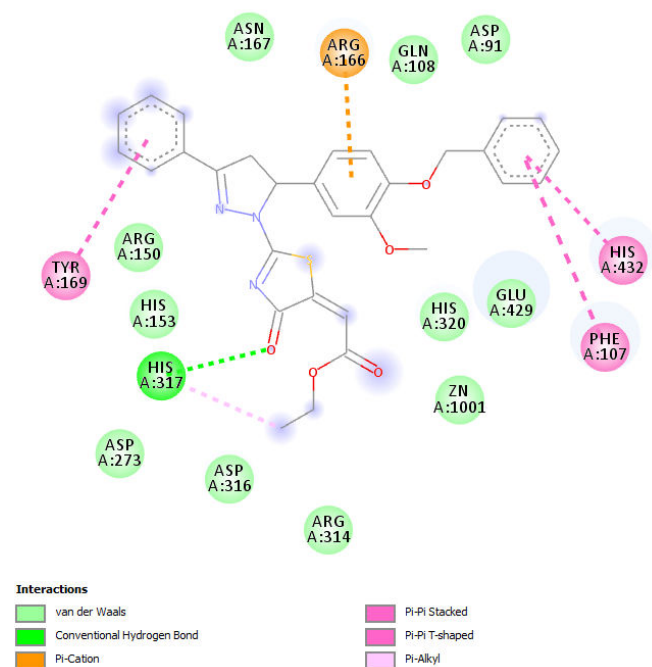

Fig. S46, ES‡

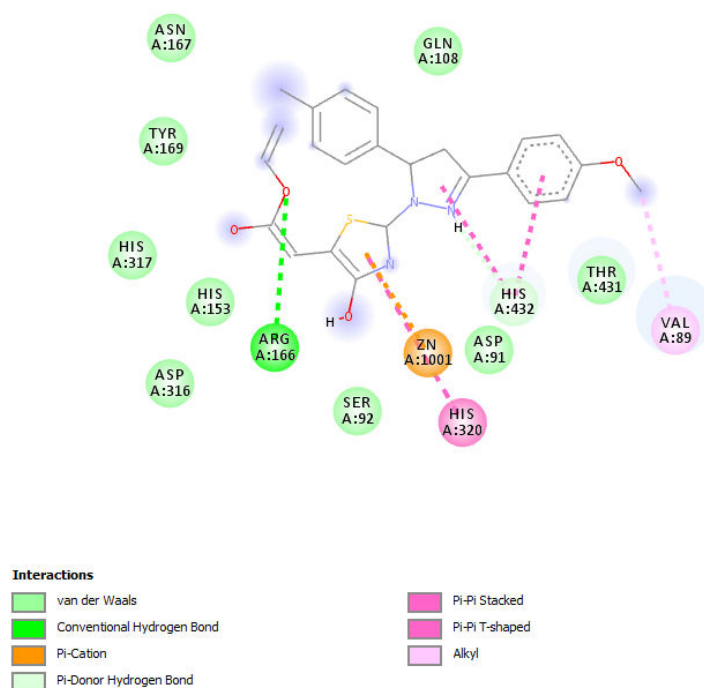

Fig. S47, ES‡

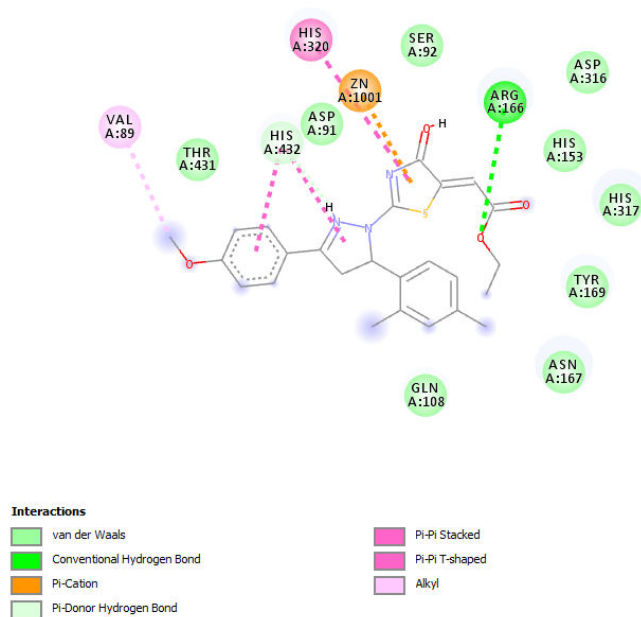

Fig. S48, ES‡

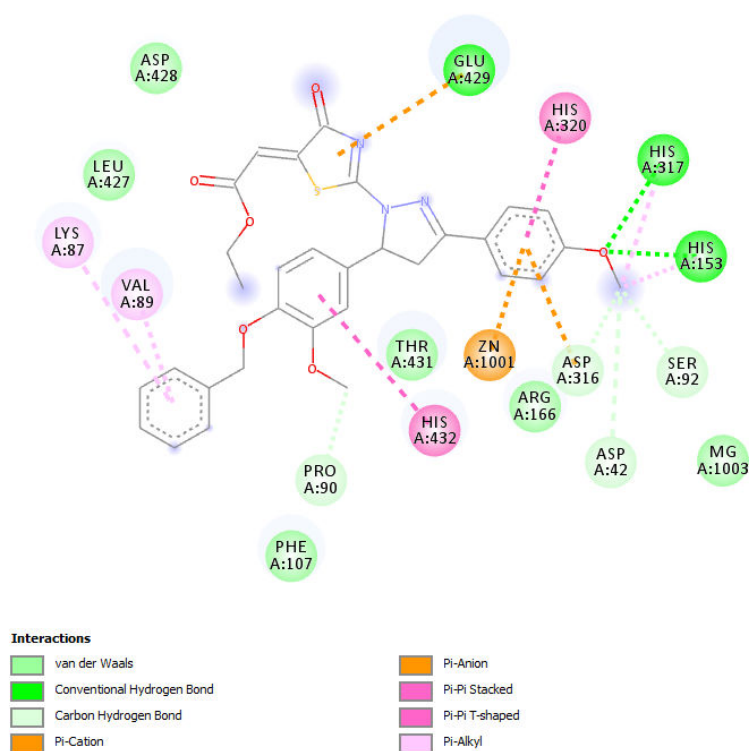

Fig. S49, ES‡

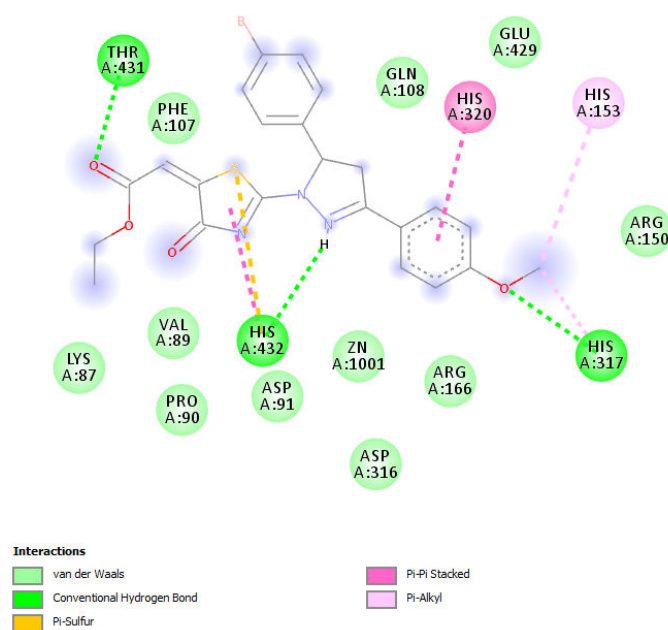

Fig. S50, ES‡

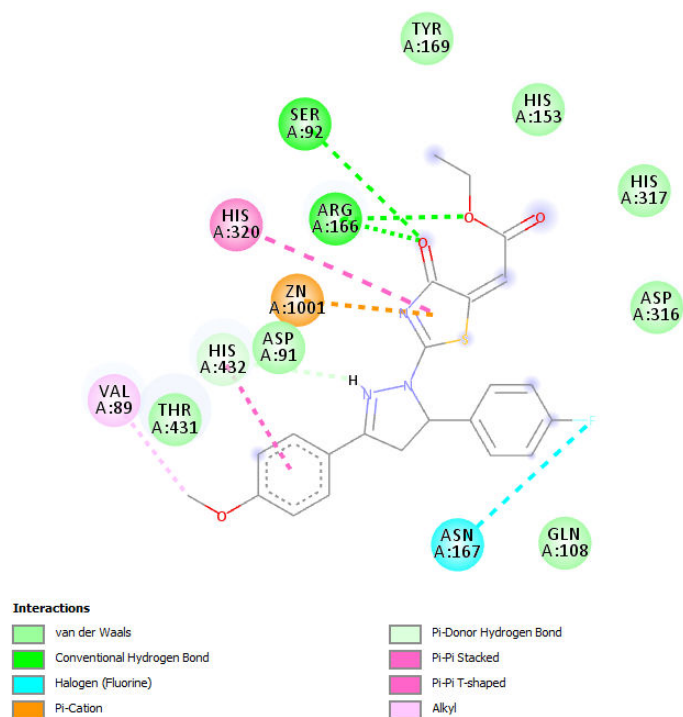

Fig. S51, ES‡

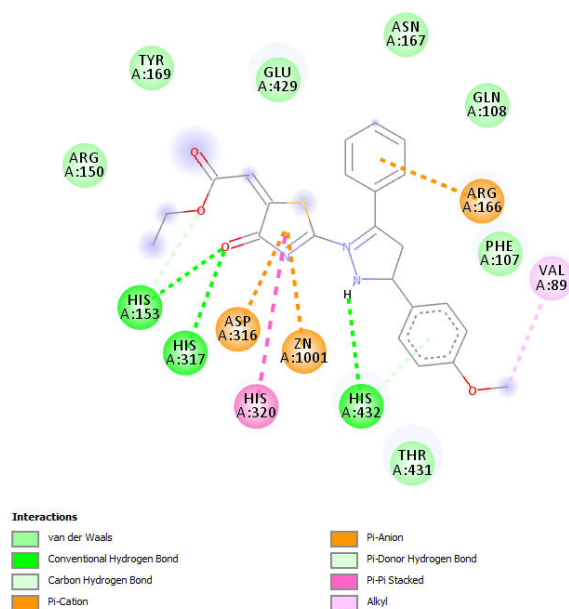

Fig. S52, ES‡

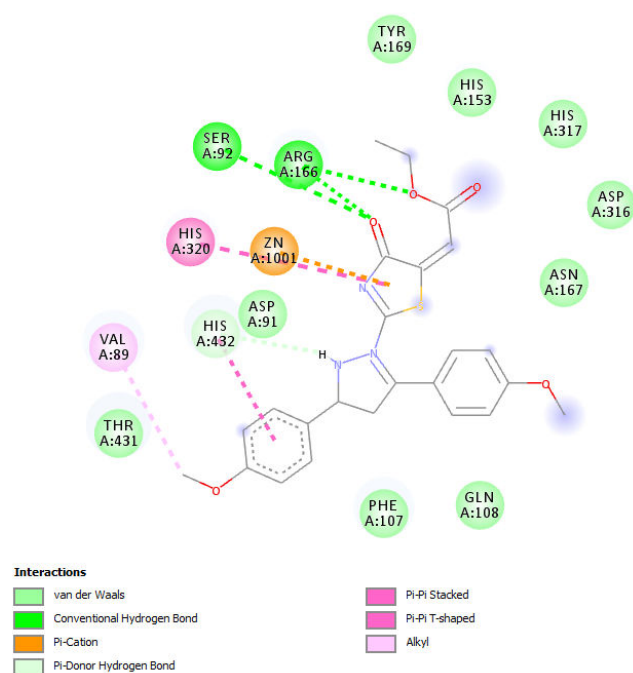

Fig. S53, ES‡

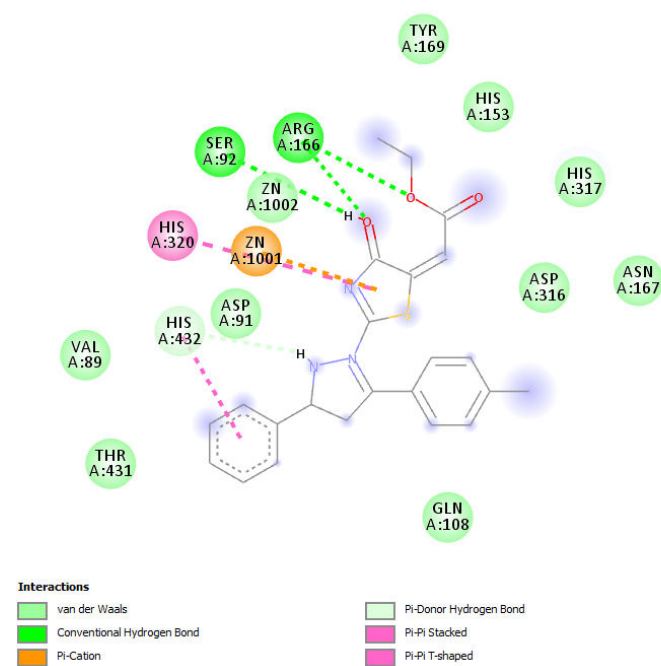

Fig. S54, ES‡

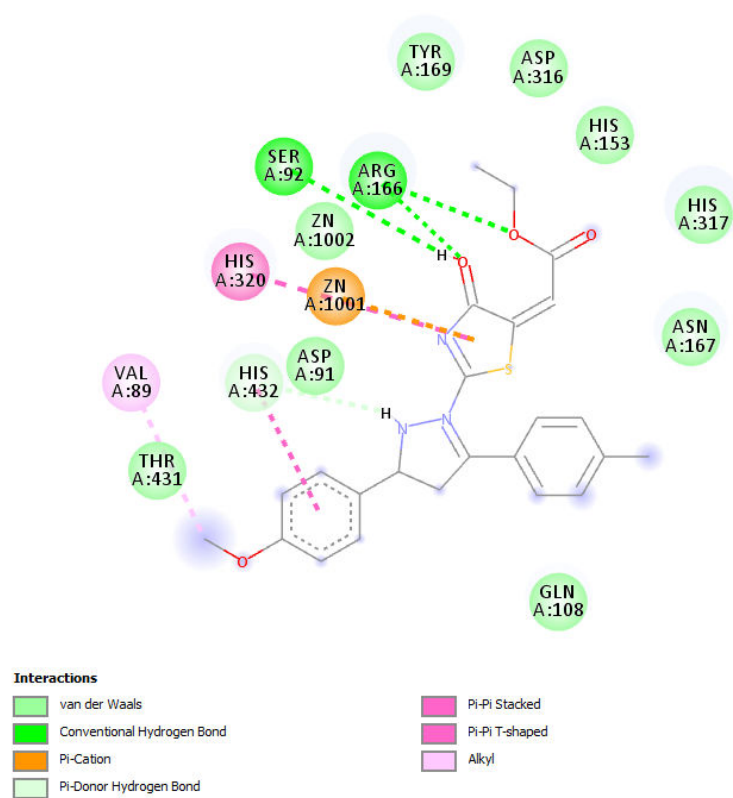

Fig. S55, ES‡

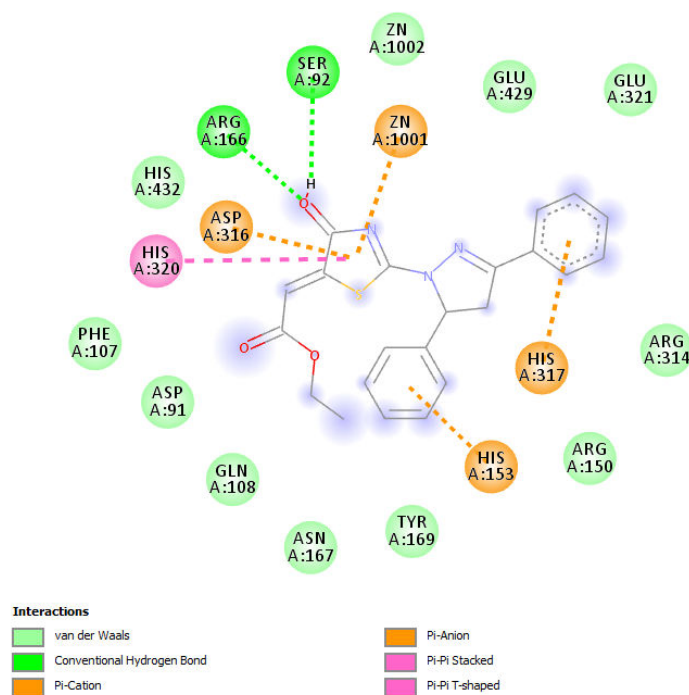

Fig. S56, ES‡

---

## References:

1. Gottlieb HE, Kotlyar V, Nudelman A. NMR chemical shifts of common laboratory solvents as trace impurities. *J Org Chem.* 1997;62(21):7512-7515.
